# Supplementary material for: Olive Flounder By-Product Prozyme2000P Hydrolysate Ameliorates Age-Related Kidney Decline by Inhibiting Ferroptosis
Source: MDPI journal article supplement (doi:10.3390/ijms25094668), 2024-04-25
Supplement: s1 [file s1]

## Supplementary Materials

Supplementary Table S1. Primer sequence for qRT-PCR

| Name           | Organism             | Forward sequence (5' to 3')    | Reverse sequence (5' to 3')   |
|----------------|----------------------|--------------------------------|-------------------------------|
| <i>Slc7a11</i> | Mus musculus (Mouse) | CTT TGT TGC CCT CTC CTG CTT C  | CAG AGG AGT GTG CTT GTG GAC A |
| <i>Gpx4</i>    | Mus musculus (Mouse) | CCT CTG CTG CAA GAG CCT CCC    | CTT ATC CAG GCA GAC CAT GTG C |
| <i>Chac1</i>   | Mus musculus (Mouse) | TGA CCC TCC TTG AAG ACC GTG A  | AGT GTC ATA GCC ACC AAG CAC G |
| <i>Alox15</i>  | Mus musculus (Mouse) | GAC ACT TGG TGG CTG AGG TCT T  | TCT CTG AGA TCA GGT CGC TCC T |
| <i>Actb</i>    | Mus musculus (Mouse) | CAT TGC TGA CAG GAT GCA GAA GG | TGC TGG AAG GTG GAC AGT GAG G |

Supplementary Figure S1. UPLC-Q-TOF MS/MS spectrum of mass produced OFBP

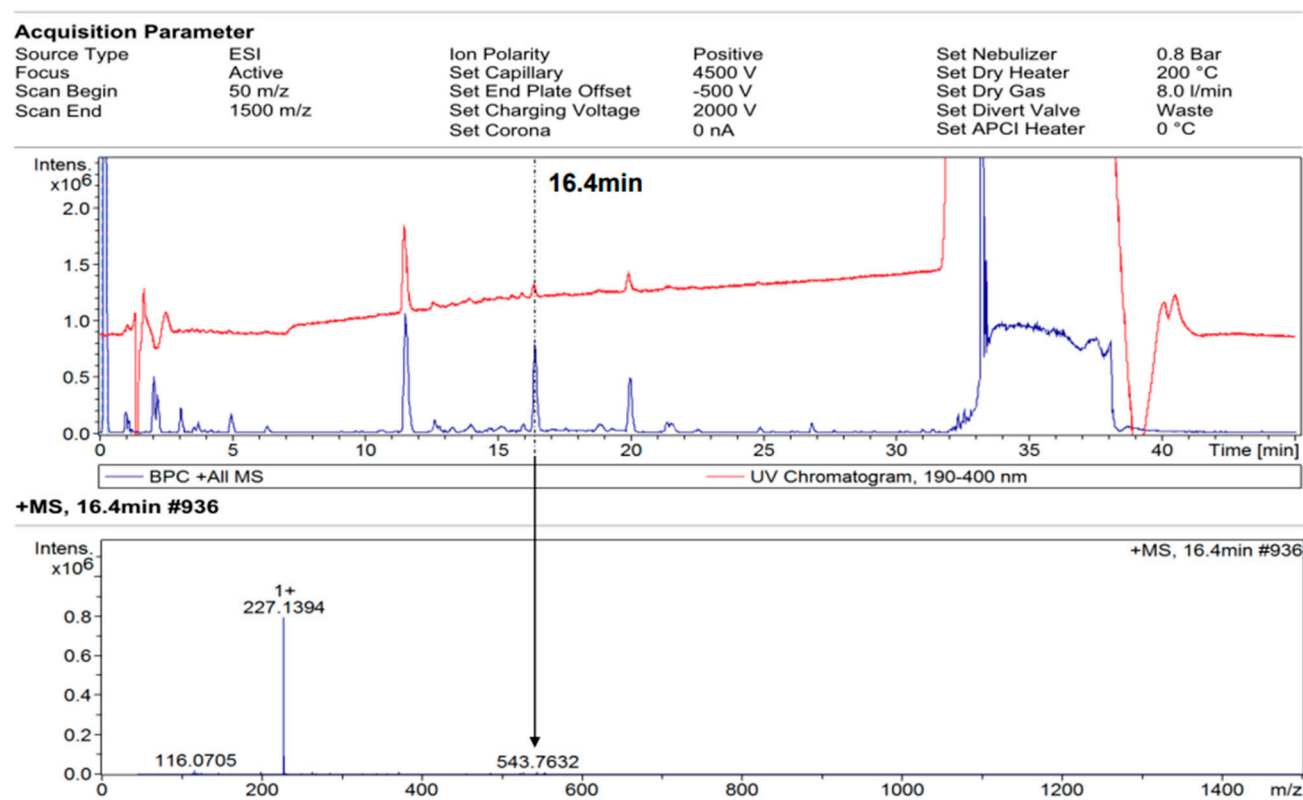

This figure show that GASGERGEVGPA purified from *P. olivaceus* was analyzed by liquid chromatography-tandem mass spectrometry (LC-MS/MS). The molecular mass and amino sequences. The LC-MS/MS spectrum of GASGERGEVGPA showed peaks at 543.7632<sup>2+</sup> m/z.
